# Supplementary material for: MicroRNA expression within neuronal-derived small extracellular vesicles in frontotemporal degeneration
Source: PubMed Central journal article supplement (PMC9542922; doi:10.1097/md.0000000000030854), 2022-10-07
Supplement: medi-101-e30854-s001.pdf [file medi-101-e30854-s001.pdf]

**SUPPLEMENTARY TABLE #1 Complete List of MicroRNA Detected in Neuronal Small Extracellular Vesicles.**

| <b>microRNA</b> | <b>Mean Control</b> | <b>Mean FTD</b> | <b>Fold Change</b> | <b>log<sup>2</sup> Fold Change</b> | <b>p-value</b> |
|-----------------|---------------------|-----------------|--------------------|------------------------------------|----------------|
| miRNA-181c      | 27.01               | 3.34            | 0.15               | -2.72                              | <0.01          |
| miRNA-3168      | 7.88                | 11.76           | 0.46               | -1.12                              | 0.08           |
| miRNA-148a      | 47.88               | 25.23           | 0.56               | -0.84                              | 0.15           |
| miRNA-22        | 2.04                | 6.38            | 2.63               | 1.40                               | 0.18           |
| miRNA-3545      | 7.41                | 19.07           | 2.35               | 1.23                               | 0.19           |
| miRNA-203       | 7.41                | 19.07           | 2.35               | 1.24                               | 0.21           |
| miRNA-122a      | 10.09               | 10.09           | 2.28               | 1.19                               | 0.21           |
| miRNA-3591      | 10.09               | 10.09           | 2.28               | 1.19                               | 0.22           |
| miRNA-126       | 14.20               | 26.82           | 1.53               | 0.61                               | 0.35           |
| miRNA-184       | 65.21               | 239.87          | 1.48               | 0.57                               | 0.43           |
| miRNA-10395     | 4.15                | 11.74           | 1.42               | 0.5                                | 0.45           |
| miRNA-151       | 9.62                | 8.57            | 0.84               | -0.25                              | 0.64           |
| let-7c          | 12.90               | 19.42           | 1.36               | 0.44                               | 0.69           |
| miRNA-423       | 10.71               | 20.54           | 1.15               | 0.21                               | 0.75           |
| miRNA-320b      | 4.33                | 8.37            | 0.82               | -0.29                              | 0.75           |
| miRNA-3184      | 10.71               | 20.54           | 1.16               | 0.21                               | 0.75           |
| miRNA-451       | 10.49               | 13.66           | 1.15               | 0.20                               | 0.77           |
| let-7b          | 10.32               | 14.18           | 1.11               | 0.15                               | 0.83           |
| miRNA-1         | 5.36                | 7.77            | 1.14               | 0.19                               | 0.83           |
| miRNA-21        | 54.56               | 62.01           | 0.95               | -0.07                              | 0.89           |
| let-7i          | 12.89               | 16.44           | 1.03               | 0.04                               | 0.96           |
| let-7f          | 5.07                | 6.87            | 0.93               | -0.11                              | 0.99           |
| let-7g          | 3.80                | 4.62            | 0.93               | -0.11                              | 0.99           |

FTD = frontotemporal dementia, miRNA = microRNA
