# Supplementary material for: MicroRNA expression within neuronal-derived small extracellular vesicles in frontotemporal degeneration
Source: PubMed Central journal article supplement (PMC9542922; doi:10.1097/md.0000000000030854), 2022-10-07
Supplement: medi-101-e30854-s002.pdf [file medi-101-e30854-s002.pdf]

**SUPPLEMENTARY TABLE # 2 KEGG pathway in Frontotemporal Dementia vs Controls**

| <b>KEGG pathway</b>                     | <b>p-value</b> | <b># of genes</b> | <b>miRNAs</b>                                                      |
|-----------------------------------------|----------------|-------------------|--------------------------------------------------------------------|
| Prion diseases                          | 1.05E-10       | 7                 | miR-22-3p<br>miR-148a-3p<br>miR-181c-3p                            |
| Fatty acid biosynthesis                 | 1.33E-09       | 3                 | miR-148a-3p<br>miR-22-3p<br>miR-181c-3p                            |
| Hippo signaling pathway                 | 1.33E-09       | 45                | miR-22-3p<br>miR-3168<br>miR-148a-3p<br>miR-181c-3p<br>miR-203b-5p |
| Viral carcinogenesis                    | 4.18E-07       | 68                | miR-22-3p<br>miR-148a-3p<br>miR-181c-3p<br>miR-203b-5p             |
| Proteoglycans in cancer                 | 7.81E-06       | 61                | miR-22-3p<br>miR-148a-3p<br>miR-181c-3p<br>miR-203b-5p             |
| TGF-beta signaling pathway              | 2.29E-05       | 27                | miR-22-3p<br>miR-3168<br>miR-148a-3p<br>miR-181c-3p                |
| Renal cell carcinoma                    | 2.29E-05       | 28                | miR-22-3p<br>miR-3168<br>miR-148a-3p<br>miR-181c-3p<br>miR-203b-5p |
| Cell cycle                              | 3.87E-05       | 48                | miR-22-3p<br>miR-148a-3p<br>miR-181c-3p<br>miR-203b-5p             |
| Transcriptional misregulation in cancer | 4.05E-05       | 58                | miR-22-3p<br>miR-3168<br>miR-148a-3p                               |

|                                                  |          |    |                                                                    |
|--------------------------------------------------|----------|----|--------------------------------------------------------------------|
|                                                  |          |    | miR-181c-3p<br>miR-203b-5p                                         |
| Central carbon metabolism in cancer              | 4.15E-05 | 25 | miR-22-3p<br>miR-148a-3p<br>miR-181c-3p<br>miR-203b-5p             |
| FoxO signaling pathway                           | 0.000163 | 47 | miR-22-3p<br>miR-3168<br>miR-148a-3p<br>miR-181c-3p<br>miR-203b-5p |
| Hepatitis B                                      | 0.000757 | 43 | miR-22-3p<br>miR-148a-3p<br>miR-181c-3p<br>miR-203b-5p             |
| Chronic myeloid leukemia                         | 0.000965 | 28 | miR-22-3p<br>miR-148a-3p<br>miR-181c-3p<br>miR-203b-5p             |
| Endocytosis                                      | 0.001101 | 66 | miR-22-3p<br>miR-3168<br>miR-148a-3p<br>miR-181c-3p<br>miR-203b-5p |
| Glycosaminoglycan biosynthesis - keratan sulfate | 0.00133  | 6  | miR-22-3p<br>miR-148a-3p<br>miR-181c-3p<br>miR-203b-5p             |
| Epstein-Barr virus infection                     | 0.001505 | 63 | miR-22-3p<br>miR-3168<br>miR-148a-3p<br>miR-181c-3p<br>miR-203b-5p |
| Lysine degradation                               | 0.002918 | 14 | miR-22-3p<br>miR-3168<br>miR-148a-3p<br>miR-181c-3p<br>miR-203b-5p |
| Steroid biosynthesis                             | 0.004031 | 7  | miR-22-3p<br>miR-148a-3p                                           |
| Signaling pathways regulating                    | 0.005723 | 44 | miR-22-3p<br>miR-3168                                              |

|                                     |          |     |                                                                    |
|-------------------------------------|----------|-----|--------------------------------------------------------------------|
| pluripotency of stem cells          |          |     | miR-148a-3p<br>miR-181c-3p<br>miR-203b-5p                          |
| Estrogen signaling pathway          | 0.005723 | 33  | miR-22-3p<br>miR-3168<br>miR-148a-3p<br>miR-181c-3p<br>miR-203b-5p |
| Pancreatic cancer                   | 0.006354 | 24  | miR-22-3p<br>miR-3168<br>miR-148a-3p<br>miR-203b-5p                |
| Colorectal cancer                   | 0.00678  | 23  | miR-22-3p<br>miR-3168<br>miR-148a-3p<br>miR-181c-3p<br>miR-203b-5p |
| Pathways in cancer                  | 0.009918 | 111 | miR-22-3p<br>miR-3168<br>miR-148a-3p<br>miR-181c-3p<br>miR-203b-5p |
| Gap junction                        | 0.014516 | 33  | miR-22-3p<br>miR-148a-3p<br>miR-181c-3p<br>miR-203b-5p             |
| Glioma                              | 0.014516 | 22  | miR-22-3p<br>miR-3168<br>miR-148a-3p<br>miR-181c-3p<br>miR-203b-5p |
| Prostate cancer                     | 0.017033 | 31  | miR-22-3p<br>miR-3168<br>miR-148a-3p<br>miR-181c-3p<br>miR-203b-5p |
| Antigen processing and presentation | 0.027344 | 22  | miR-22-3p<br>miR-148a-3p<br>miR-181c-3p<br>miR-203b-5p             |
| Ubiquitin mediated proteolysis      | 0.030559 | 43  | miR-22-3p<br>miR-3168                                              |

|                                                   |          |    |                                                                    |
|---------------------------------------------------|----------|----|--------------------------------------------------------------------|
|                                                   |          |    | miR-148a-3p<br>miR-181c-3p                                         |
| Adherens junction                                 | 0.032351 | 23 | miR-22-3p<br>miR-148a-3p<br>miR-181c-3p                            |
| Endometrial cancer                                | 0.032351 | 19 | miR-22-3p<br>miR-3168<br>miR-148a-3p<br>miR-181c-3p<br>miR-203b-5p |
| Sulfur metabolism                                 | 0.032889 | 3  | miR-148a-3p<br>miR-181c-3p                                         |
| Protein processing<br>in endoplasmic<br>reticulum | 0.033103 | 51 | miR-22-3p<br>miR-3168<br>miR-148a-3p<br>miR-181c-3p<br>miR-203b-5p |
| Progesterone-<br>mediated oocyte<br>maturation    | 0.037928 | 29 | miR-22-3p<br>miR-148a-3p<br>miR-181c-3p                            |
| Huntington's<br>disease                           | 0.049355 | 46 | miR-22-3p<br>miR-3168<br>miR-148a-3p<br>miR-181c-3p<br>miR-203b-5p |
