# Supplementary material for: MicroRNA expression within neuronal-derived small extracellular vesicles in frontotemporal degeneration
Source: PubMed Central journal article supplement (PMC9542922; doi:10.1097/md.0000000000030854), 2022-10-07
Supplement: medi-101-e30854-s003.pdf [file medi-101-e30854-s003.pdf]

**SUPPLEMENTARY TABLE #3** KEGG Pathway Analysis of Alzheimer's Disease vs Healthy Controls

| KEGG pathway               | p-value  | # of genes | #miRNAs                                                                                            |
|----------------------------|----------|------------|----------------------------------------------------------------------------------------------------|
| Proteoglycans in cancer    | 2.37E-10 | 90         | miR-122-5p<br>miR-22-3p<br>miR-3591-3p<br>miR-148a-3p<br>miR-181c-3p<br>miR-203a-3p<br>miR-203b-5p |
| Hippo signaling pathway    | 2.69E-09 | 59         | miR-122-5p<br>miR-22-3p<br>miR-3591-3p<br>miR-148a-3p<br>miR-181c-3p<br>miR-203a-3p<br>miR-203b-5p |
| Prion diseases             | 8.54E-08 | 9          | miR-122-5p<br>miR-22-3p<br>miR-3591-3p<br>miR-148a-3p<br>miR-181c-3p                               |
| TGF-beta signaling pathway | 2.32E-07 | 37         | miR-122-5p<br>miR-22-3p<br>miR-3591-3p<br>miR-148a-3p<br>miR-181c-3p<br>miR-203a-3p                |
| Fatty acid biosynthesis    | 8.67E-07 | 4          | miR-122-5p<br>miR-22-3p<br>miR-148a-3p<br>miR-181c-3p                                              |
| Chronic myeloid leukemia   | 1.28E-06 | 40         | miR-122-5p<br>miR-22-3p<br>miR-3591-3p<br>miR-148a-3p<br>miR-181c-3p<br>miR-203a-3p<br>miR-203b-5p |
| Viral carcinogenesis       | 3.44E-06 | 79         | miR-122-5p<br>miR-22-3p<br>miR-3591-3p                                                             |

|                                                     |          |    |                                                                                                    |
|-----------------------------------------------------|----------|----|----------------------------------------------------------------------------------------------------|
|                                                     |          |    | miR-148a-3p<br>miR-181c-3p<br>miR-203b-5p                                                          |
| Gap junction                                        | 1.85E-05 | 43 | miR-122-5p<br>miR-22-3p<br>miR-3591-3p<br>miR-148a-3p<br>miR-181c-3p<br>miR-203a-3p<br>miR-203b-5p |
| Glycosaminoglycan biosynthesis -<br>keratan sulfate | 2.32E-05 | 9  | miR-122-5p<br>miR-22-3p<br>miR-3591-3p<br>miR-148a-3p<br>miR-181c-3p<br>miR-203b-5p                |
| Renal cell carcinoma                                | 3.55E-05 | 35 | miR-122-5p<br>miR-22-3p<br>miR-3591-3p<br>miR-148a-3p<br>miR-181c-3p<br>miR-203a-3p<br>miR-203b-5p |
| Glioma                                              | 3.55E-05 | 32 | miR-122-5p<br>miR-22-3p<br>miR-3591-3p<br>miR-148a-3p<br>miR-181c-3p<br>miR-203a-3p<br>miR-203b-5p |
| Prostate cancer                                     | 3.55E-05 | 45 | miR-122-5p<br>miR-22-3p<br>miR-3591-3p<br>miR-148a-3p<br>miR-181c-3p<br>miR-203a-3p<br>miR-203b-5p |
| Cell cycle                                          | 3.76E-05 | 58 | miR-122-5p<br>miR-22-3p<br>miR-3591-3p<br>miR-148a-3p<br>miR-181c-3p<br>miR-203a-3p                |

|                                      |          |     |                                                                                                    |
|--------------------------------------|----------|-----|----------------------------------------------------------------------------------------------------|
|                                      |          |     | miR-203b-5p                                                                                        |
| FoxO signaling pathway               | 6.11E-05 | 59  | miR-122-5p<br>miR-22-3p<br>miR-3591-3p<br>miR-148a-3p<br>miR-181c-3p<br>miR-203a-3p<br>miR-203b-5p |
| Hepatitis B                          | 6.11E-05 | 59  | miR-122-5p<br>miR-22-3p<br>miR-3591-3p<br>miR-148a-3p<br>miR-181c-3p<br>miR-203a-3p<br>miR-203b-5p |
| Thyroid hormone signaling pathway    | 8.43E-05 | 53  | miR-122-5p<br>miR-22-3p<br>miR-3591-3p<br>miR-148a-3p<br>miR-181c-3p<br>miR-203a-3p                |
| Central carbon metabolism in cancer  | 0.000102 | 32  | miR-122-5p<br>miR-22-3p<br>miR-3591-3p<br>miR-148a-3p<br>miR-181c-3p<br>miR-203b-5p                |
| Other types of O-glycan biosynthesis | 0.000153 | 13  | miR-122-5p<br>miR-22-3p<br>miR-3591-3p<br>miR-148a-3p<br>miR-181c-3p                               |
| Insulin signaling pathway            | 0.00047  | 63  | miR-122-5p<br>miR-22-3p<br>miR-3591-3p<br>miR-148a-3p<br>miR-181c-3p<br>miR-203a-3p<br>miR-203b-5p |
| Pathways in cancer                   | 0.000584 | 149 | miR-122-5p<br>miR-22-3p<br>miR-3591-3p<br>miR-148a-3p                                              |

|                                                          |          |    |                                                                                                    |
|----------------------------------------------------------|----------|----|----------------------------------------------------------------------------------------------------|
|                                                          |          |    | miR-181c-3p<br>miR-203a-3p<br>miR-203b-5p                                                          |
| Adherens junction                                        | 0.000592 | 33 | miR-122-5p<br>miR-22-3p<br>miR-3591-3p<br>miR-148a-3p<br>miR-181c-3p<br>miR-203a-3p                |
| Pancreatic cancer                                        | 0.000592 | 32 | miR-122-5p<br>miR-22-3p<br>miR-3591-3p<br>miR-148a-3p<br>miR-203a-3p<br>miR-203b-5p                |
| Transcriptional misregulation in cancer                  | 0.000617 | 69 | miR-122-5p<br>miR-22-3p<br>miR-3591-3p<br>miR-148a-3p<br>miR-181c-3p<br>miR-203a-3p<br>miR-203b-5p |
| Estrogen signaling pathway                               | 0.000641 | 42 | miR-122-5p<br>miR-22-3p<br>miR-3591-3p<br>miR-148a-3p<br>miR-181c-3p<br>miR-203b-5p                |
| Signaling pathways regulating pluripotency of stem cells | 0.001192 | 57 | miR-122-5p<br>miR-22-3p<br>miR-3591-3p<br>miR-148a-3p<br>miR-181c-3p<br>miR-203a-3p<br>miR-203b-5p |
| Neurotrophin signaling pathway                           | 0.001802 | 53 | miR-122-5p<br>miR-22-3p<br>miR-3591-3p<br>miR-148a-3p<br>miR-181c-3p<br>miR-203a-3p<br>miR-203b-5p |
| mTOR signaling pathway                                   | 0.002913 | 29 | miR-122-5p                                                                                         |

|                                                           |          |    |                                                                                                    |
|-----------------------------------------------------------|----------|----|----------------------------------------------------------------------------------------------------|
|                                                           |          |    | miR-22-3p<br>miR-3591-3p<br>miR-148a-3p<br>miR-181c-3p<br>miR-203a-3p<br>miR-203b-5p               |
| Non-small cell lung cancer                                | 0.007094 | 26 | miR-122-5p<br>miR-22-3p<br>miR-3591-3p<br>miR-148a-3p<br>miR-203a-3p                               |
| Epstein-Barr virus infection                              | 0.007789 | 77 | miR-122-5p<br>miR-22-3p<br>miR-3591-3p<br>miR-148a-3p<br>miR-181c-3p<br>miR-203a-3p<br>miR-203b-5p |
| Small cell lung cancer                                    | 0.007981 | 39 | miR-122-5p<br>miR-22-3p<br>miR-3591-3p<br>miR-148a-3p<br>miR-181c-3p<br>miR-203a-3p<br>miR-203b-5p |
| Glycosylphosphatidylinositol(GPI)-<br>anchor biosynthesis | 0.00823  | 13 | miR-122-5p<br>miR-22-3p<br>miR-3591-3p<br>miR-148a-3p<br>miR-181c-3p                               |
| Endocytosis                                               | 0.00934  | 76 | miR-122-5p<br>miR-22-3p<br>miR-3591-3p<br>miR-148a-3p<br>miR-181c-3p<br>miR-203a-3p<br>miR-203b-5p |
| Focal adhesion                                            | 0.00934  | 80 | miR-122-5p<br>miR-22-3p<br>miR-3591-3p<br>miR-148a-3p<br>miR-181c-3p<br>miR-203a-3p                |

|                                 |          |    |                                                                                                    |
|---------------------------------|----------|----|----------------------------------------------------------------------------------------------------|
|                                 |          |    | miR-203b-5p                                                                                        |
| Endometrial cancer              | 0.011328 | 25 | miR-122-5p<br>miR-22-3p<br>miR-3591-3p<br>miR-148a-3p<br>miR-181c-3p<br>miR-203a-3p<br>miR-203b-5p |
| 2-Oxocarboxylic acid metabolism | 0.014662 | 7  | miR-122-5p<br>miR-22-3p<br>miR-3591-3p                                                             |
| Ubiquitin mediated proteolysis  | 0.014662 | 56 | miR-122-5p<br>miR-22-3p<br>miR-3591-3p<br>miR-148a-3p<br>miR-181c-3p<br>miR-203a-3p                |
| AMPK signaling pathway          | 0.014662 | 50 | miR-122-5p<br>miR-22-3p<br>miR-3591-3p<br>miR-148a-3p<br>miR-181c-3p<br>miR-203a-3p<br>miR-203b-5p |
| Sulfur metabolism               | 0.015062 | 4  | miR-122-5p<br>miR-148a-3p<br>miR-181c-3p<br>miR-203a-3p                                            |
| HIF-1 signaling pathway         | 0.016506 | 44 | miR-122-5p<br>miR-22-3p<br>miR-3591-3p<br>miR-148a-3p<br>miR-181c-3p<br>miR-203a-3p                |
| Rap1 signaling pathway          | 0.016506 | 77 | miR-122-5p<br>miR-22-3p<br>miR-3591-3p<br>miR-148a-3p<br>miR-181c-3p<br>miR-203a-3p<br>miR-203b-5p |
| Melanoma                        | 0.016506 | 31 | miR-122-5p<br>miR-22-3p                                                                            |

|                                        |          |    |                                                                                                    |
|----------------------------------------|----------|----|----------------------------------------------------------------------------------------------------|
|                                        |          |    | miR-3591-3p<br>miR-148a-3p<br>miR-181c-3p<br>miR-203a-3p<br>miR-203b-5p                            |
| Dorso-ventral axis formation           | 0.019066 | 15 | miR-122-5p<br>miR-22-3p<br>miR-3591-3p<br>miR-148a-3p                                              |
| Colorectal cancer                      | 0.023831 | 27 | miR-122-5p<br>miR-22-3p<br>miR-148a-3p<br>miR-181c-3p<br>miR-203b-5p                               |
| MAPK signaling pathway                 | 0.025619 | 92 | miR-122-5p<br>miR-22-3p<br>miR-3591-3p<br>miR-148a-3p<br>miR-181c-3p<br>miR-203a-3p<br>miR-203b-5p |
| ErbB signaling pathway                 | 0.035829 | 35 | miR-122-5p<br>miR-22-3p<br>miR-3591-3p<br>miR-148a-3p<br>miR-181c-3p<br>miR-203a-3p<br>miR-203b-5p |
| Regulation of actin cytoskeleton       | 0.035829 | 77 | miR-122-5p<br>miR-22-3p<br>miR-3591-3p<br>miR-148a-3p<br>miR-181c-3p<br>miR-203a-3p<br>miR-203b-5p |
| Bacterial invasion of epithelial cells | 0.035829 | 30 | miR-122-5p<br>miR-22-3p<br>miR-3591-3p<br>miR-148a-3p<br>miR-181c-3p<br>miR-203a-3p<br>miR-203b-5p |

|                                             |          |     |                                                                                                    |
|---------------------------------------------|----------|-----|----------------------------------------------------------------------------------------------------|
| Progesterone-mediated oocyte maturation     | 0.040168 | 36  | miR-122-5p<br>miR-22-3p<br>miR-3591-3p<br>miR-148a-3p<br>miR-181c-3p                               |
| PI3K-Akt signaling pathway                  | 0.043069 | 119 | miR-122-5p<br>miR-22-3p<br>miR-3591-3p<br>miR-148a-3p<br>miR-181c-3p<br>miR-203a-3p<br>miR-203b-5p |
| Valine, leucine and isoleucine biosynthesis | 0.048163 | 2   | miR-22-3p<br>miR-3591-3p                                                                           |
