# Supplementary material for: MicroRNA expression within neuronal-derived small extracellular vesicles in frontotemporal degeneration
Source: PubMed Central journal article supplement (PMC9542922; doi:10.1097/md.0000000000030854), 2022-10-07
Supplement: medi-101-e30854-s004.pdf [file medi-101-e30854-s004.pdf]

**SUPPLEMENTARY TABLE #4** Comparison of Cerebral Spinal Fluid and Plasma Concentrations of Neuronal Small Extracellular Vesicle MicroRNA

| <b>MicroRNA</b> | <b>Fold Change</b> | <b>log<sup>2</sup> Fold Change</b> | <b>p-value</b> |
|-----------------|--------------------|------------------------------------|----------------|
| Let-7b-5p       | 1.09               | 0.13                               | 0.90           |
| miRNA-21-5p     | 4.48               | 2.16                               | 0.10           |
| miRNA-148a-3p   | 0.48               | -1.07                              | 0.31           |
| miRNA-184       | 1.11               | 0.15                               | 0.87           |
| miRNA-181c      | 0.79               | -0.34                              | 0.79           |
